# Supplementary material for: In situ formed carbon bonded and encapsulated selenium composites for Li–Se and Na–Se batteries
Source: Royal Society of Chemistry journal article supplement (doi:10.1039/c4ta04611k), 2014-10-28
Supplement: c4ta04611k1.pdf [file c4ta04611k1.pdf]

## Supporting Information

**Title:** *In Situ* Formed Carbon Bonded and Encapsulated Selenium Composites for Li-Se and Na-Se Batteries

Chao Luo<sup>a</sup>, Jingjing Wang<sup>b</sup>, Liumin Suo<sup>a</sup>, Jianfeng Mao<sup>a</sup>, Xiulin Fan<sup>a</sup> and Chunsheng Wang<sup>a\*</sup>

Affiliation: <sup>a</sup>Department of Chemical and Biomolecular Engineering, University of Maryland, College Park, MD 20742, USA; <sup>b</sup>Department of Chemistry and Biochemistry, University of Maryland, College Park, MD, 20742, USA.

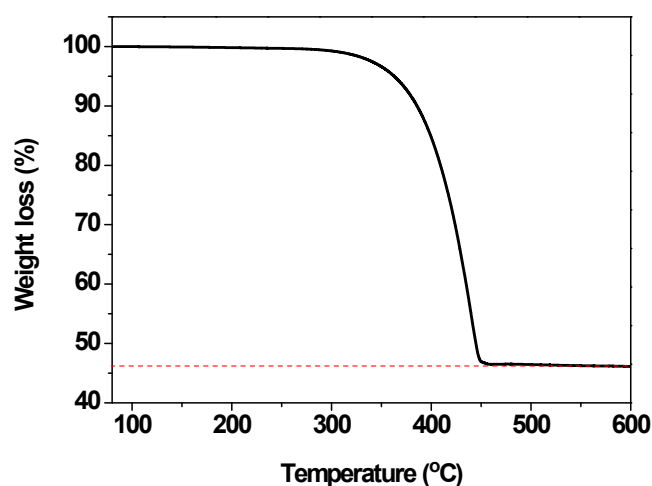

Figure S1. The TG analysis for *In Situ* Formed C/Se composites.

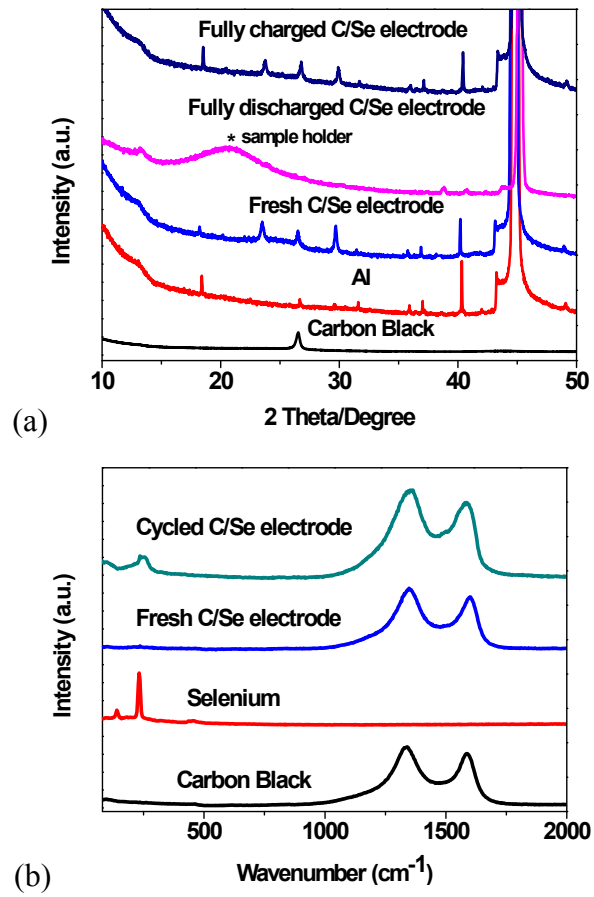

Figure S2. (a) XRD patterns for carbon black, Al foil, fresh C/Se electrode and cycled C/Se electrode; (b) Raman spectra for carbon black, selenium, fresh C/Se electrode and cycled C/Se electrode.
